# Supplementary material
Source: PubMed Central journal article supplement (PMC4933643)
Supplement: supp_4.2.E205_2015-0116_Original_submission.pdf [file supp_4.2.E205_2015-0116_Original_submission.pdf]

**TITLE:** CMA Rheumatology Wait Time Benchmarks: The need to tame the queue across the continuum of care

**Authors:**

Jessica Widdifield<sup>1,2\*</sup>; Sasha Bernatsky<sup>2,3</sup>, J Carter Thorne<sup>4</sup>, Claire Bombardier<sup>5</sup>, R. Liisa Jaakkimainen<sup>1,5</sup>, Laura Wing<sup>1</sup>, J. Michael Paterson<sup>1,6</sup>, Noah Ivers<sup>1,7</sup>, Debra Butt<sup>5,8</sup>, Anne Lyddiatt<sup>9</sup>, Catherine Hofstetter<sup>10</sup>, Vandana Ahluwalia<sup>11</sup>, and Karen Tu<sup>1,5</sup>

**Affiliations:**

<sup>1</sup> Institute for Clinical Evaluative Sciences, Toronto, Ontario, Canada

<sup>2</sup> McGill University Health Centre, Montreal, Quebec, Canada

<sup>3</sup> McGill University, Montreal, Quebec, Canada

<sup>4</sup> Southlake Regional Health Centre, Newmarket, Ontario, Canada

<sup>5</sup> University of Toronto, Toronto, Ontario, Canada

<sup>6</sup> McMaster University, Hamilton, Ontario, Canada

<sup>7</sup> Women's College Hospital, Toronto, Ontario, Canada

<sup>8</sup> Scarborough Hospital, Toronto, Ontario, Canada

<sup>9</sup> Ingersoll, Ontario, Canada

<sup>10</sup> Toronto, Ontario, Canada

<sup>11</sup> William Osler Health Centre, Brampton, Ontario Canada

**\*Correspondence:**

Jessica Widdifield [Jessica.widdifield@utoronto.ca](mailto:Jessica.widdifield@utoronto.ca)

Institute for Clinical Evaluative Sciences - Central

G1-11, 2075 Bayview Avenue, Toronto, Ontario M4N 3M5

**Contributors:**

JW, LW, KT, LJ had full access to all data in the study and guarantees the integrity of the data and accuracy of the analyses. JW drafted the manuscript. All authors revised the manuscript critically for important intellectual content. All authors have contributed substantially to the design, analysis and interpretation, have approved the final version submitted for publication, and agreed to act as guarantor of the work.

**Funding Statement:**

This study was funded by an operating grant from the Canadian Initiative For Outcomes in Rheumatology Care (CIORA).

**Manuscript Details:**

Abstract word count: 244/250

Manuscript Word Count: 2480/2500

No. of Tables: 6

No. of Figures: 1

No. of References: 53

**ABSTRACT**

**Background:** The Canadian Medical Association's Wait Times Alliance recently established wait time benchmarks for rheumatology consultations. Our aim was to quantify wait times to rheumatologist consultation, overall and for different diagnostic categories.

**Methods:** We identified patients with referrals to Ontario rheumatologists in the Electronic Medical Record Administrative data Linked Database (EMRALD). To assess the full patient care pathway, dates of symptom onset, presentation in primary care, and referral were identified from the primary care electronic medical records (EMRs). Dates of rheumatologist consultations were obtained by linking with physician service claims. The duration of each phase of the care pathway (symptom onset to primary care to referral to rheumatologist consultation) was determined and compared with established benchmarks.

**Results:** Among 2430 referrals from 168 family physicians, 83% of patients were seen by 146 rheumatologists. The main reasons for referral were arthritis (32%) and systemic inflammatory rheumatic diseases (31%). Wait times varied by condition and region. Overall, the median time from referral to rheumatologist consultation was 74 days; 66 days for systemic inflammatory rheumatic diseases. Wait time benchmarks were not achieved, even for the most urgent types of referrals. For systemic inflammatory rheumatic diseases, most of the delays occurred prior to referral.

**Interpretation:** Rheumatology wait times exceeded established benchmarks. Targeted efforts are needed to promote more timely access to both primary care and rheumatology care. Routine linkage of EMR with administrative data may help fill important gaps in knowledge about waits to primary and specialty care.

## INTRODUCTION

Timely access to primary care and specialists is a nation-wide concern. The Canadian Medical Association's (CMA) Wait Times Alliance has mobilized efforts to reduce the excessive wait times that Canadians experience by establishing comparable indicators and evidence-based benchmarks for medically acceptable wait times(1, 2). Recent efforts have called upon the need to address wait times to primary care(3) and non-surgical specialists(4). Unfortunately, there is no universal approach in Canada to systematically measure and monitor wait times from primary care referral to specialist consultation. Moreover, a truly patient-centered approach to wait times measurement must address the total wait faced by patients, including the time from symptom onset to see a primary care physician, the time for the primary care physician to request a referral, and then the wait to see a specialist.

Rheumatology wait time benchmarks have recently been established(4). Rheumatic diseases represent the second greatest cause of disability and the fourth greatest impact on the overall world population health (in terms of both death and disability)(5, 6). Given the growing burden and overall impact of rheumatic diseases (7-9), providing these patients with timely access to healthcare remains a pan-Canadian challenge that will only intensify over time.

Primary care physicians play an essential role in coordinating care with rheumatologists to effectively diagnose, manage and treat patients with rheumatic diseases. Optimal care for rheumatic diseases hinges on early access to rheumatologists but there are many hurdles that can impede optimal care, such as delays in patient presentation and physician referrals (10). Although evidence for the benefits of early detection and treatment for improving patient outcomes has been well demonstrated in inflammatory arthritis (11-24), benchmarks for other rheumatic diseases have not yet been established - Box 1(4).

Reports on rheumatology wait times have arisen primarily from urban centres that do not

reflect the geographic realities of Canada (25-27). Previous studies quantifying delays to rheumatology care have also predominately focused on rheumatoid arthritis (RA) patients from rheumatology clinics and thus restrict analyses to only a subset of rheumatology referrals and those who successfully accessed specialists (25, 28-30). In light of this evidence gap, and the lack of systemic measurements to inform wait times across the continuum of care for patients with rheumatic diseases, we employed a novel approach to linking primary care electronic medical records (EMRs) with administrative health data to quantify delays to rheumatology care – overall, and for different diagnostic categories – for each component of the care pathway.

### Box 1. Wait time benchmarks

#### Recommended maximum wait time from referral to rheumatologist consultation(4, 31)

|                                                     |                     |
|-----------------------------------------------------|---------------------|
| Rheumatoid arthritis ; other inflammatory arthritis | <b>FOUR WEEKS</b>   |
| Psoriatic arthritis                                 | <b>SIX WEEKS</b>    |
| Spondyloarthritis                                   | <b>THREE MONTHS</b> |
| Systemic lupus erythematosus                        | <b>FOUR WEEKS</b>   |

## METHODS

**Study Design.** We conducted an observational study involving EMRs from primary care physicians (to provide accurate dates of when referrals were requested) linked with health administrative data (to provide accurate dates of encounters with rheumatologists).

**Data Sources.** We used the Electronic Medical Record Administrative data Linked Database (EMRALD), comprised of electronic clinical practice data from primary care physicians throughout Ontario(32). Information includes patient and provider demographics and all electronic data captured during primary care visits, current and past medical histories, laboratory test results, prescriptions, referral letters, and diagnostic tests, as well as information related to care received elsewhere and reported to the practice.

EMRALD participants are also linked to the following administrative datasets. The Ontario Health Insurance Plan (OHIP) Corporate Provider Database (CPDB) is used to determine

1  
2  
3 physician demographics, training and practice location, defined using the Ontario Medical  
4 Association's Rurality Index of Ontario(33). Physician group affiliations were identified in the  
5 Client Agency Program Enrolment (CAPE) database of patient enrollments with primary care  
6 groups.  
7

8  
9  
10 Patient demographics including age, sex, patient residence and regional health service planning  
11 areas (Local Health Integration Networks, LHIN) were determined from the OHIP Registered  
12 Persons Database (RPDB). Encounters with rheumatologists were identified using the OHIP  
13 Claims History Database, with rheumatology specialty defined using the Institute for Clinical  
14 Evaluative Sciences (ICES) Physician Database (IPDB).  
15

16  
17 These datasets are linked using unique, encoded patient and physician identifiers and are  
18 securely held and analyzed at ICES ([www.ices.on.ca](http://www.ices.on.ca)).  
19

20  
21 **Participants.** At the time of the study, 168 primary care physicians were included from across  
22 Ontario. From 268,854 patients with valid health insurance numbers, we identified 2,925 patients  
23 who had at least one electronic referral letter to a rheumatologist within the EMR from 2000 to  
24 2013. Administrative data were obtained for these patients up until October 31, 2014. In an effort  
25 to study first time referrals to rheumatology, we excluded patients with 're-referrals' (occurring  
26 if the first referral occurred before the EMR start date), second opinions, miscoded rheumatology  
27 referral letters, or missing or invalid referral dates.  
28

29  
30 **Data abstraction.** Using a standardized data abstraction tool, the entire patient EMR was  
31 reviewed to categorize each patient according to their diagnosis or clinical impression, identify  
32 dates of symptom onset and the first encounter to the primary care physician related to the  
33 complaint. Patients were categorized into five diagnostic categories: mechanical/degenerative  
34 arthritis (e.g., osteoarthritis, OA), systemic inflammatory rheumatic diseases, regional  
35  
36  
37  
38  
39  
40  
41  
42  
43  
44  
45

1  
2  
3 musculoskeletal syndromes (e.g., tendonitis), chronic pain conditions (e.g., fibromyalgia),  
4  
5 osteoporosis/osteopenia, and other (e.g., abnormal tests). Systemic inflammatory rheumatic  
6  
7  
8 diseases were further categorized into mutually exclusive categories: rheumatoid arthritis (RA),  
9  
10 other inflammatory arthritis (e.g., seronegative, undifferentiated, palindromic rheumatism), gout  
11  
12 and other crystal arthropathies (e.g., pseudo-gout, calcium pyrophosphate deposition), psoriatic  
13  
14 arthritis, other spondyloarthropathies (e.g., ankylosing spondylitis, reactive, enteropathic),  
15  
16 polymyalgia rheumatica, vasculitis, and other systemic autoimmune rheumatic diseases (e.g.,  
17  
18 systemic lupus, scleroderma, Sjogren's, dermatomyositis, Raynaud's). When multiple  
19  
20 conditions co-existed, the patient was assigned to the most serious complaint requiring  
21  
22 consultation (e.g., a patient with pre-existing OA and acute onset inflammatory arthritis was  
23  
24 categorized into the latter category). When there was discordance between physicians, the  
25  
26 diagnosis was categorized according to the rheumatologist's impression (based on rheumatology  
27  
28 consultation letters received post-referral).  
29  
30  
31  
32  
33

34 **Analysis.** To determine generalizability of our results, we assessed the characteristics of  
35  
36 EMRALD study physicians in comparison to all Ontario primary care physicians. Descriptive  
37  
38 statistics were used to characterize the study population according to reason for referral. The wait  
39  
40 time was determined overall and for each diagnostic category for each component of the care  
41  
42 pathway: 1) symptom onset until the date of the first primary care visit related to the complaint;  
43  
44 2) first primary care visit related to the complaint until the date of referral to a rheumatologist;  
45  
46 and 3) date the referral was sent to the date of the first rheumatologist visit. Patients were  
47  
48 followed for at least 365 days from the date of the referral to identify the date of the first  
49  
50 rheumatologist visit subsequent to the referral date recorded in the EMR. Wait times were  
51  
52 compared with the established target wait times to determine the percentage of patients seen by a  
53  
54  
55  
56  
57  
58  
59  
60

1  
2  
3 rheumatologist within each time frame. Actual wait-times (in days), including medians  
4  
5 (interquartile ranges, IQR), means (standard deviations, SD), and 50<sup>th</sup> and 90<sup>th</sup> percentiles were  
6  
7 estimated. Wait times from symptom onset were estimated for patients with systemic  
8  
9 inflammatory conditions for whom symptom onset dates could be determined. Regional wait  
10  
11 times according to the patient's residence were also evaluated.  
12  
13

14  
15 Analyses were performed on coded data using SAS version 9.2 and Microsoft SQL  
16  
17 Server 2012. Ethics approval was obtained from the institutional review board at Sunnybrook  
18  
19 Health Sciences Centre in Toronto, Ontario.  
20  
21

## 22 23 24 **RESULTS**

25  
26 EMERALD physicians (representing 32 rural, 39 suburban, and 97 urban practices) were  
27  
28 slightly younger, with more females and rural representation, in comparison to all Ontario  
29  
30 primary care physicians (Table 1).  
31  
32

33  
34 After screening 2925 patients to identify first time referrals, 2430 (83%) patients were  
35  
36 retained for analyses (Figure 1). Overall, 2417 (99.5%) referrals occurred between 2005 and  
37  
38 2013 corresponding to the average duration of EMR use.  
39  
40

41  
42 Among 2430 patients referred to rheumatologists, 69% were female and the mean (SD)  
43  
44 age at time of referral was 53 (16) years (Table 2). The most frequent referrals included  
45  
46 mechanical/degenerative arthritis (N=787; 32%) and systemic inflammatory rheumatic diseases  
47  
48 (N=745; 31%). The breakdown of systemic inflammatory rheumatic diseases were RA (16%),  
49  
50 other inflammatory arthritis (22%), other systemic autoimmune rheumatic diseases (18%),  
51  
52 crystal arthropathies (16%), spondylitis/spondyloarthropathies (10%), psoriatic arthritis (6%),  
53  
54 polymyalgia rheumatica (9%), and vasculitis (3%), Table 2, Figure 1.  
55  
56  
57  
58  
59  
60

1  
2  
3 In total, 68 (3%) patients had documentation of declining or missing the initial  
4 rheumatology consultation after the referral letter was sent (Table 3). Of these 68 patients, 35%  
5 subsequently saw a rheumatologist. Similarly, 87 (4%) referrals were declined by the first  
6 rheumatologist approached to assess the patient. The majority of declined referrals were for non-  
7 systemic inflammatory conditions. The most common reason for refusal was that the  
8 rheumatologist only assessed patients with certain conditions (Table 3). Of these 87 patients,  
9 59% subsequently saw another rheumatologist.  
10  
11  
12  
13  
14  
15  
16  
17  
18

19  
20 According to administrative data, 2015 (83%) patients were seen by 146 distinct  
21 rheumatologists within 365 days of referral, and 58% of patients were seen within three months  
22 of referral. Wait times varied by condition (Table 4). The median (IQR) time from referral to  
23 rheumatologist was 74 (27-101) days among all patients and 66 (18-84) days among patients  
24 with systemic inflammatory rheumatic diseases.  
25  
26  
27  
28  
29  
30

31  
32 For systemic inflammatory rheumatic diseases, 33% were seen within four weeks of  
33 referral (Table 4). Comparing to established CMA wait time benchmarks (target being 100%),  
34 38% of RA patients were seen within four weeks of the date of referral (35% for other  
35 inflammatory arthritis), 63% of spondyloarthritis patients were seen within three months; and  
36 34% of psoriatic arthritis patients were seen within six weeks. For RA patients, the median time  
37 to be seen by rheumatologists from symptom onset and date of referral was 327 and 66 days,  
38 respectively (Table 4-5). Wait times from symptom onset to rheumatologist also varied amongst  
39 different types of systemic inflammatory rheumatic diseases (Table 5). The total delay was  
40 longest for patients with crystal arthropathies and spondylitis.  
41  
42  
43  
44  
45  
46  
47  
48  
49  
50  
51  
52

53  
54 Geographic variations in wait times were observed (Table 6). The longest wait times  
55 consistently occurred in the South West LHIN and the Champlain LHIN, where median waits  
56  
57  
58  
59  
60



1  
2  
3 from referral to rheumatology consultation were 2-3 times those in the Central East LHIN.  
4  
5  
6  
7

## 8 **Interpretation**

9  
10 Using EMRs from a representative sample of primary care practices revealed exceedingly  
11 long wait times to see rheumatologists. Established wait time benchmarks were not achieved for  
12 even the most urgent types of referrals (i.e. inflammatory arthritis including RA). Close to one in  
13 three referrals were for systemic inflammatory conditions and these were seen earlier compared  
14 to other types of referrals. However, most of the delay for these urgent conditions occurred prior  
15 to referral, representing delays in patients seeking medical attention and family doctors waiting  
16 too long to refer patients who require earlier access.  
17  
18  
19  
20  
21  
22  
23  
24  
25  
26

27 Previous Canadian reports among RA patients seen in urban settings estimated shorter  
28 wait times than our study: three to six months wait from symptom onset to referral and then  
29 approximately one month from referral to see a rheumatologist(25-27, 29, 30). Our findings  
30 confirm that wait times in certain urban areas, such as Toronto, are shorter than elsewhere in the  
31 province. There is also ample evidence from international studies that support our findings that  
32 the majority of the delay occurs prior to referral (34-38). This suggests delays attributed to the  
33 awareness and care-seeking behavior of patients, as well as opportunities to improve screening in  
34 primary care.  
35  
36  
37  
38  
39  
40  
41  
42  
43  
44

45  
46 | Wait time measurement plays an important part in driving quality improvement and  
47 accountability. The CMA economic wait times report identified the wait time costs for joint  
48 replacement surgery to be significantly higher than for other priority areas(39). Yet, the costs of  
49 the ‘excess wait’ ignored the total costs endured by patients in getting to see the specialist or  
50 even in getting to see their family doctor. As the decision-making and timing for orthopedic  
51  
52  
53  
54  
55  
56  
57  
58  
59  
60

1  
2  
3 surgery is often established by an interdisciplinary team of rheumatologists and orthopedic  
4  
5 surgeons, our findings contribute novel data on the excessive wait times patients endure across  
6  
7 the entire patient care pathway. Reducing wait times to rheumatologists for appropriate care  
8  
9 management may ultimately reduce the need for joint replacement surgery (40, 41).  
10  
11

12  
13 In Canada, both rheumatologists and primary care physicians identify long wait times as  
14  
15 a barrier to providing adequate care (42-44), and waits to see rheumatologists are longer than for  
16  
17 most other medical subspecialties(45). We believe our findings represent a call to action on the  
18  
19 need for increasing awareness amongst patients, physicians and policy-makers of the major  
20  
21 burden that rheumatic diseases places on individuals, society and healthcare systems and to  
22  
23 prioritize planning of healthcare services, medical education (46, 47), and research (9). The  
24  
25 relative shortage of rheumatologists(48-50) especially in rural areas and the projected increasing  
26  
27 burden of rheumatic diseases(5, 8) suggests a need for innovative models of care(51, 52).  
28  
29 Rheumatology referrals are often not done in a standardized or consistent way and wait times  
30  
31 vary by individual rheumatologist. Primary care physicians may refer patients to the  
32  
33 rheumatologist they know the best,(53) unaware of the shorter wait times of other  
34  
35 rheumatologists. This suggests a need for better ways to systematically track and report waits at  
36  
37 the level of specialists. Finally, given the substantial delay in patients seeking medical attention  
38  
39 and the delay of primary care physicians requesting referrals, increasing patient awareness and  
40  
41 medical education are acutely needed.  
42  
43  
44  
45  
46  
47

48  
49 While our study is the largest and most detailed to document the experience of Canadians  
50  
51 with rheumatic diseases waiting to access primary and rheumatology care, several limitations  
52  
53 warrant discussion. The retrospective nature of the data meant that we were reliant upon accurate  
54  
55 clinical documentation. This raises the possibility of misclassification between diagnostic  
56  
57  
58  
59

1  
2  
3 categories. Since patients with more classic disease presentation or more active disease may be  
4 more correctly diagnosed, and wait times may be different for such patients, such  
5 misclassification could introduce bias. Furthermore, dates of symptom onset may be inaccurately  
6 documented, and we were unable to estimate symptom onset for chronic complaints. However,  
7 dates of symptom onset for systemic inflammatory conditions with acute onset are less likely to  
8 be affected by recall bias. Finally, wait times are likely to differ across provinces. Our regional  
9 variations within province did not appear to correlate well with regional rheumatology supply  
10 (Table 6) as patients may seek care outside of their health-planning region or there may be  
11 different thresholds for referral by region. For example, the delay from symptom onset to  
12 rheumatologist was much longer for RA in the North East (data not shown) yet the wait from  
13 referral to rheumatologist was shorter compared to other regions, which may reflect referrals  
14 being requested when physicians are aware of locum rheumatologists visiting the area. Despite  
15 these limitations, we present a unique approach to monitoring wait times for specialist care in the  
16 absence of a national wait time reporting system.

17  
18  
19  
20  
21  
22  
23  
24  
25  
26  
27  
28  
29  
30  
31  
32  
33  
34  
35  
36  
37  
38  
39  
40  
41  
42  
43  
44  
45  
46  
47  
48  
49  
50  
51  
52  
53  
54  
55  
56  
57  
58  
59  
60

In conclusion, wait times to rheumatologists exceeded established benchmarks and improving access is urgently required. For systemic inflammatory rheumatic diseases, most of the delay occurs prior to referral, where targeted efforts are needed to promote more timely consultations. As Canadian administrative data currently cannot be used to monitor wait times to specialists, approaches to linking EMR and administrative data are worth exploring.

**Acknowledgements:**

First and foremost, we wish to thank all the primary physicians who provide data to EMERALD. We would like to thank our chart abstractors for their work: Monique Kerr-Taylor, Adeniki Mornan, and Anne Marie Moir.

This study was funded by an operating grant from the Canadian Initiative For Outcomes in Rheumatology Care (CIORA) and supported by the Institute for Clinical Evaluative Sciences (ICES), which is funded by an annual grant from the Ontario Ministry of Health and Long-Term Care (MOHLTC). The opinions, results and conclusions reported in this paper are those of the authors and are independent from the funding sources. No endorsement by ICES or the Ontario MOHLTC is intended or should be inferred.

JW holds Fellowship Awards from The Arthritis Society and the Canadian Institutes of Health Research (CIHR) Banting; and is supported by the Canadian Network for Advanced Interdisciplinary Methods (CAN-AIM) for comparative effectiveness research team funded by the CIHR Drug Safety and Effectiveness Network (DSEN). SB holds a career award from the Fonds de la recherche en santé du Québec. CB holds a Canada Research Chair in Knowledge Transfer for Musculoskeletal Care and a Pfizer Research Chair in Rheumatology. NI is supported by New Investigator Awards from the CIHR and the Department of Family and Community Medicine at the University of Toronto. KT, RLJ, and DB are supported by Investigator Awards from the Department of Family and Community Medicine at the University of Toronto.

**Conflict of interest**

The authors declare there are no conflicts of interest related to this study.

CMAJ

---

1  
2  
3  
4  
5  
6  
7  
8  
9  
10  
11  
12  
13  
14  
15  
16  
17  
18  
19  
20  
21  
22  
23  
24  
25  
26  
27  
28  
29  
30  
31  
32  
33  
34  
35  
36  
37  
38  
39  
40  
41  
42  
43  
44  
45  
46  
47  
48  
49  
50  
51  
52  
53  
54  
55  
56  
57  
58  
59  
60

Confidential

**REFERENCES:**

1. Siciliani L, Borowitz M, Moran V. *Waiting Time Policies in the Health Sector: What Works?* Paris: OECD Publishing; 2013.
2. Postl BD. *Final report of the federal advisor on wait times.* Ottawa (ON): Health Canada, 2006.
3. CMA. *The Wait Starts Here: The Primary Care Wait Time Partnership.* 2009.
4. *Time to Close the Gap: Report Card on Wait Times in Canada.* 2014.
5. *Global Burden of Disease Study. Global, regional, and national incidence, prevalence, and years lived with disability for 301 acute and chronic diseases and injuries in 188 countries, 1990-2013: a systematic analysis for the Global Burden of Disease Study 2013.* *Lancet.* 2015; 386(9995):743-800.
6. *Global Burden of Disease Study. Global, regional, and national age-sex specific all-cause and cause-specific mortality for 240 causes of death, 1990-2013: a systematic analysis for the Global Burden of Disease Study 2013.* *Lancet.* 2015;385(9963):117-71.
7. Hoy DG, Smith E, Cross M, Sanchez-Riera L, Blyth FM, Buchbinder R, et al. Reflecting on the global burden of musculoskeletal conditions: lessons learnt from the global burden of disease 2010 study and the next steps forward. *Ann Rheum Dis.* 2015;74(1):4-7.
8. Smith E, Hoy DG, Cross M, Vos T, Naghavi M, Buchbinder R, et al. The global burden of other musculoskeletal disorders: estimates from the Global Burden of Disease 2010 study. *Ann Rheum Dis.* 2014;73(8):1462-9.
9. Al Maini M, Adelowo F, Al Saleh J, Al Weshahi Y, Burmester GR, Cutolo M, et al. The global challenges and opportunities in the practice of rheumatology: white paper by the World Forum on Rheumatic and Musculoskeletal Diseases. *Clin Rheumatol.* 2015;34(5):819-29.
10. Verschueren P, Westhovens R. Optimal care for early RA patients: the challenge of translating scientific data into clinical practice. *Rheumatology (Oxford).* 2011;50(7):1194-200.
11. Bosello S, Fedele AL, Peluso G, Gremese E, Tulusso B, Ferraccioli G. Very early rheumatoid arthritis is the major predictor of major outcomes: clinical ACR remission and radiographic non-progression. *Annals of the rheumatic diseases.* 2011;70(7):1292-5.
12. Jayakumar K, Norton S, Dixey J, James D, Gough A, Williams P, et al. Sustained clinical remission in rheumatoid arthritis: prevalence and prognostic factors in an inception cohort of patients treated with conventional DMARDs. *Rheumatology.* 2012;51(1):169-75.
13. van der Woude D, Young A, Jayakumar K, Mertens BJ, Toes RE, van der Heijde D, et al. Prevalence of and predictive factors for sustained disease-modifying antirheumatic drug-free remission in rheumatoid arthritis: results from two large early arthritis cohorts. *Arthritis and rheumatism.* 2009;60(8):2262-71.
14. Finckh A, Liang MH, van Herckenrode CM, de Pablo P. Long-term impact of early treatment on radiographic progression in rheumatoid arthritis: A meta-analysis. *Arthritis and rheumatism.* 2006;55(6):864-72.
15. Anderson JJ, Wells G, Verhoeven AC, Felson DT. Factors predicting response to treatment in rheumatoid arthritis: the importance of disease duration. *Arthritis and rheumatism.* 2000;43(1):22-9.
16. Nell VP, Machold KP, Eberl G, Stamm TA, Uffmann M, Smolen JS. Benefit of very early referral and very early therapy with disease-modifying anti-rheumatic drugs in patients with early rheumatoid arthritis. *Rheumatology (Oxford).* 2004;43(7):906-14.

17. van der Linden MP, le Cessie S, Raza K, van der Woude D, Knevel R, Huizinga TW, et al. Long-term impact of delay in assessment of patients with early arthritis. *Arthritis Rheum.* 2010;62(12):3537-46.
18. Kirkham B, Li W, Boggs R, Nab R, Tarallo M. Early treatment of psoriatic arthritis is associated with improved outcomes: findings from the Etanercept (Enbrel) PRESTA Trial. *Arthritis and rheumatism.* 2011;63(Suppl 10):1288.
19. Wallace CA, Giannini EH, Spalding SJ, Hashkes PJ, O'Neil KM, Zeff AS, et al. Trial of early aggressive therapy in polyarticular juvenile idiopathic arthritis. *Arthritis and rheumatism.* 2012;64(6):2012-21.
20. Barkham N, Keen HI, Coates LC, O'Connor P, Hensor E, Fraser AD, et al. Clinical and imaging efficacy of infliximab in HLA-B27-Positive patients with magnetic resonance imaging-determined early sacroiliitis. *Arthritis and rheumatism.* 2009;60(4):946-54.
21. Haibel H, Rudwaleit M, Listing J, Heldmann F, Wong RL, Kupper H, et al. Efficacy of adalimumab in the treatment of axial spondylarthritis without radiographically defined sacroiliitis: results of a twelve-week randomized, double-blind, placebo-controlled trial followed by an open-label extension up to week fifty-two. *Arthritis and rheumatism.* 2008;58(7):1981-91.
22. Wallis D, Inman RD. Recognition of preclinical and early disease in axial spondyloarthritis. *Rheumatic diseases clinics of North America.* 2014;40(4):685-97.
23. Fiehn C, Hajjar Y, Mueller K, Waldherr R, Ho AD, Andrassy K. Improved clinical outcome of lupus nephritis during the past decade: importance of early diagnosis and treatment. *Ann Rheum Dis.* 2003;62(5):435-9.
24. Haroon M, Gallagher P, FitzGerald O. Diagnostic delay of more than 6 months contributes to poor radiographic and functional outcome in psoriatic arthritis. *Ann Rheum Dis.* 2015;74(6):1045-50.
25. Jamal S, Alibhai SM, Badley EM, Bombardier C. Time to treatment for new patients with rheumatoid arthritis in a major metropolitan city. *J Rheumatol.* 2011;38(7):1282-8.
26. Feldman DE, Schieir O, Montcalm AJ, Bernatsky S, Baron M. Rapidity of rheumatology consultation for people in an early inflammatory arthritis cohort. *Ann Rheum Dis.* 2009;68(11):1790-1.
27. Qian J, Ehrmann Feldman D, Bissonauth A, Menard HA, Panopolis P, Stein M, et al. A retrospective review of rheumatology referral wait times within a health centre in Quebec, Canada. *Rheumatol Int.* 2010;30(5):705-7.
28. Delaurier A, Bernatsky S, Baron M, Legare J, Feldman DE. Wait times for rheumatology consultation: is rheumatoid arthritis prioritized? *J Clin Rheumatol.* 2012;18(7):341-4.
29. Tavares R, Pope JE, Tremblay JL, Thorne C, Bykerk VP, Lazovskis J, et al. Time to Disease-modifying Antirheumatic Drug Treatment in Rheumatoid Arthritis and Its Predictors: A National, Multicenter, Retrospective Cohort. *J Rheumatol.* 2012.
30. Nanji JA, Choi M, Ferrari R, Lyddell C, Russell AS. Time to consultation and disease-modifying antirheumatic drug treatment of patients with rheumatoid arthritis--Northern Alberta perspective. *J Rheumatol.* 2012;39(4):707-11.
31. Barber C, Marshall D, Mosher D, Akhavan P, Tucker L, Houghton K, et al. Developing System-Level Performance Measures for Evaluation of Models of Care for Inflammatory Arthritis Framework. Arthritis Alliance of Canada 2014.  
[http://www.arthritisalliance.ca/images/PDF/Final%20Background%20MOC\\_Nov6.pdf](http://www.arthritisalliance.ca/images/PDF/Final%20Background%20MOC_Nov6.pdf)

- 1  
2  
3 32. Tu K, Mitiku TF, Ivers NM, Guo H, Lu H, Jaakkimainen L, et al. Evaluation of  
4 Electronic Medical Record Administrative data Linked Database (EMRALD). *Am J Manag*  
5 *Care*. 2014;20(1):e15-21.
- 6  
7 33. Kralj B. Measuring 'rurality' for purposes of health-care planning: an empirical measure  
8 for Ontario. *Ontario Medical Review*: 2000.
- 9  
10 34. Kumar K, Daley E, Carruthers DM, Situnayake D, Gordon C, Grindulis K, et al. Delay in  
11 presentation to primary care physicians is the main reason why patients with rheumatoid arthritis  
12 are seen late by rheumatologists. *Rheumatology (Oxford)*. 2007;46(9):1438-40.
- 13  
14 35. Raza K, Stack R, Kumar K, Filer A, Detert J, Bastian H, et al. Delays in assessment of  
15 patients with rheumatoid arthritis: variations across Europe. *Ann Rheum Dis*. 2011;70(10):1822-  
16 5.
- 17  
18 36. Stack RJ, Shaw K, Mallen C, Herron-Marx S, Horne R, Raza K. Delays in help seeking  
19 at the onset of the symptoms of rheumatoid arthritis: a systematic synthesis of qualitative  
20 literature. *Ann Rheum Dis*. 2012;71(4):493-7.
- 21  
22 37. Kumar K, Daley E, Khattak F, Buckley CD, Raza K. The influence of ethnicity on the  
23 extent of, and reasons underlying, delay in general practitioner consultation in patients with RA.  
24 *Rheumatology (Oxford)*. 2010;49(5):1005-12.
- 25  
26 38. Kiely P, Williams R, Walsh D, Young A, Early Rheumatoid Arthritis N. Contemporary  
27 patterns of care and disease activity outcome in early rheumatoid arthritis: the ERAN cohort.  
28 *Rheumatology (Oxford)*. 2009;48(1):57-60.
- 29  
30 39. The economic cost of wait times in Canada. The Centre for Spatial Economics: Canadian  
31 Medical Association; 2008.  
32 [http://www.facturation.net/multimedia/CMA/Content/Images/Inside\\_cma/Media\\_Release/pdf/2](http://www.facturation.net/multimedia/CMA/Content/Images/Inside_cma/Media_Release/pdf/2008/EconomicReport.pdf)  
33 [008/EconomicReport.pdf](http://www.facturation.net/multimedia/CMA/Content/Images/Inside_cma/Media_Release/pdf/2008/EconomicReport.pdf)
- 34  
35 40. Moura CS, Abrahamowicz M, Beauchamp ME, Lacaille D, Wang Y, Boire G, et al. Early  
36 medication use in new-onset rheumatoid arthritis may delay joint replacement: results of a large  
37 population-based study. *Arthritis Res Ther*. 2015;17:197.
- 38  
39 41. Feldman DE, Bernatsky S, Houde M, Beauchamp ME, Abrahamowicz M. Early  
40 consultation with a rheumatologist for RA: does it reduce subsequent use of orthopaedic  
41 surgery? *Rheumatology (Oxford)*. 2013;52(3):452-9.
- 42  
43 42. Shipton D, Badley EM, Bookman AA, Hawker GA. Barriers to providing adequate  
44 rheumatology care: implications from a survey of rheumatologists in ontario, Canada. *J*  
45 *Rheumatol*. 2002;29(11):2420-5.
- 46  
47 43. Glazier R, Dalby D, Badley E, Hawker G, Bell M, Buchbinder R, et al. Management of  
48 the early and late presentations of rheumatoid arthritis: a survey of Ontario primary care  
49 physicians. *CMAJ*. 1996;155(6):679-87.
- 50  
51 44. Bernatsky S, Feldman D, De Civita M, Haggerty J, Tousignant P, Legare J, et al. Optimal  
52 care for rheumatoid arthritis: a focus group study. *Clin Rheumatol*. 2010;29(6):645-57.
- 53  
54 45. Jaakkimainen L, Glazier R, Barnsley J, Salkeld E, Lu H, Tu K. Waiting to see the  
55 specialist: patient and provider characteristics of wait times from primary to specialty care. *BMC*  
56 *Fam Pract*. 2014;15:16.
- 57  
58 46. Freedman KB, Bernstein J. Educational deficiencies in musculoskeletal medicine. *J Bone*  
59 *Joint Surg Am*. 2002;84-A(4):604-8.
- 60  
61 47. Thompson AE. Improving undergraduate musculoskeletal education: a continuing  
62 challenge. *J Rheumatol*. 2008;35(12):2298-9.



- 1  
2  
3  
4  
5  
6  
7  
8  
9  
10  
11  
12  
13  
14  
15  
16  
17  
18  
19  
20  
21  
22  
23  
24  
25  
26  
27  
28  
29  
30  
31  
32  
33  
34  
35  
36  
37  
38  
39  
40  
41  
42  
43  
44  
45  
46  
47  
48  
49  
50  
51  
52  
53  
54  
55  
56  
57  
58  
59  
60
48. Widdifield J, Paterson JM, Bernatsky S, Tu K, Thorne JC, Ahluwalia V, et al. The rising burden of rheumatoid arthritis surpasses rheumatology supply in ontario. *Can J Public Health*. 2013;104(7):e450-5.
49. Hanly JG, Canadian Council of Academic R. Manpower in Canadian academic rheumatology units: current status and future trends. *Canadian Council of Academic Rheumatologists. J Rheumatol*. 2001;28(9):1944-51.
50. Kur J, Koehler B. Rheumatologist demographics in British Columbia: A looming crisis. *BCMJ* 2011;53(3):128-31.
51. Ahluwalia V, Frank C, Mosher DP, Zummer M. A pan-Canadian approach to inflammatory arthritis models of care: Arthritis Alliance of Canada; 2014 [updated 23 August 2014]. Available from: <http://www.arthritisalliance.ca>.
52. Canada AAo. Inflammatory Arthritis Care Path Toolkit: Arthritis Alliance of Canada; 2014 [cited 2014 December 29]. Available from: <http://www.arthritisalliance.ca/images/caremap/en/index.htm>.
53. Lou B, Civita M, Feldman D, Bissonauth A, Bernatsky S. Care partnerships between family physicians and rheumatologists. *J Rheumatol*. 2011;38(9):1981-5.

**Table 1. Comparison of EMERALD study physicians and all primary care physicians in Ontario as of March 31, 2014**

| Characteristic                   | EMERALD Physicians<br>N=168 |              | All Primary Care<br>Physicians in<br>Ontario <sup>1</sup><br>N=8054 |              |
|----------------------------------|-----------------------------|--------------|---------------------------------------------------------------------|--------------|
|                                  | N                           | %            | N                                                                   | %            |
| <b>Sex</b>                       |                             |              |                                                                     |              |
| Female                           | 94                          | 56.0         | 3333                                                                | 41.4         |
| Male                             | 74                          | 44.0         | 4721                                                                | 58.7         |
| <b>Age group</b>                 |                             |              |                                                                     |              |
| Under 35 years                   | 25                          | 14.9         | 500                                                                 | 6.2          |
| 35-44 years                      | 57                          | 33.9         | 1643                                                                | 20.4         |
| 45-54 years                      | 36                          | 21.4         | 2425                                                                | 30.1         |
| 55-79 years                      | 46                          | 27.4         | 3471                                                                | 43.1         |
| Unknown                          | 4                           | 2.4          | 15                                                                  | 0.2          |
| <b>Medical training location</b> |                             |              |                                                                     |              |
| Canada                           | 150                         | 89.3         | 5967                                                                | 74.1         |
| International                    | 17                          | 10.1         | 2074                                                                | 25.8         |
| Unknown                          | 1                           | 0.6          | 13                                                                  | 0.2          |
| <b>Practice Location</b>         |                             |              |                                                                     |              |
| Rural                            | 32                          | 19.1         | 631                                                                 | 7.6          |
| Suburban                         | 39                          | 23.2         | 1355                                                                | 16.3         |
| Urban                            | 97                          | 57.7         | 6325                                                                | 76.1         |
| <b>Group Model<sup>2</sup></b>   |                             |              |                                                                     |              |
| FHG or FHN                       | 18                          | 10.7         | 2795                                                                | 34.7         |
| FHO                              | 136                         | 81.0         | 3525                                                                | 43.8         |
| Other/Unknown                    | 14                          | 8.3          | 1734                                                                | 21.5         |
|                                  | <b>Mean</b>                 | <b>Range</b> | <b>Mean</b>                                                         | <b>Range</b> |
| <b>Physician Age</b>             | 46.6                        | 28-69        | 52.2                                                                | 27-79        |
| <b>Years in practice</b>         | 15.2                        | 1-36         | 18.5                                                                | 0-45         |
| <b>Years since graduation</b>    | 19.9                        | 3-43         | 26.3                                                                | 2-65         |

<sup>1</sup> Primary care physicians were defined as having a main specialty of general physician/family physician or Community Medicine/Public Health who's practice is focused on primary care;  
<sup>2</sup> Abbreviations: Family Health Groups (FHG); Family Health Networks (FHN); Family Health Organizations (FHO)

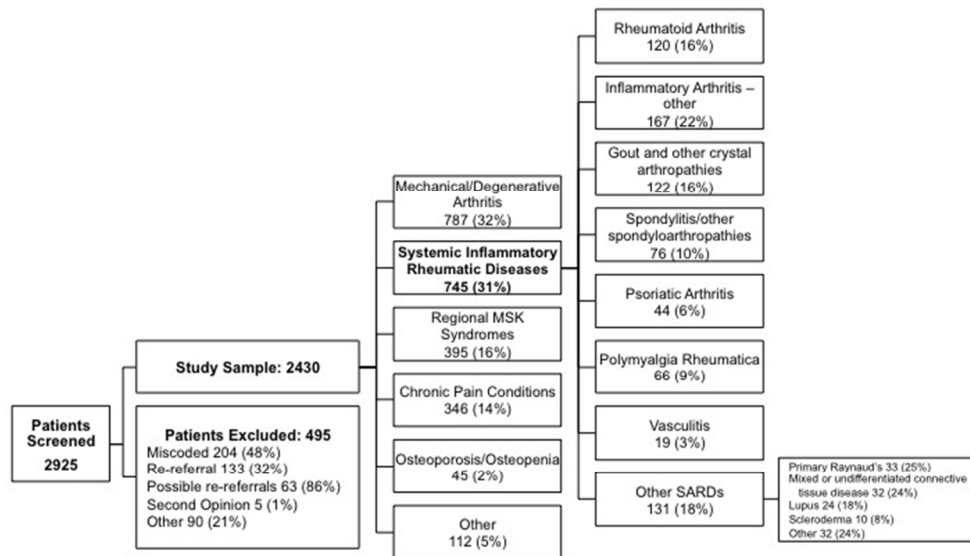

Study flow diagram of sample selection and classification of referrals  
 254x142mm (72 x 72 DPI)

Table 2. Patient Characteristics at time of referral

|                                                 | No. of Patients | Age, Mean (SD) | Female, n (%) |
|-------------------------------------------------|-----------------|----------------|---------------|
| <b>All Patients</b>                             | 2430            | 53.0 (16.3)    | 1682 (69.2)   |
| <b>Arthritis</b>                                | 787             | 56.4 (15.6)    | 554 (70.4)    |
| <b>Systemic Inflammatory Rheumatic Diseases</b> | 745             | 53.4 (17.0)    | 427 (57.3)    |
| Rheumatoid Arthritis                            | 120             | 55.4 (15.8)    | 84 (70.0)     |
| Inflammatory Arthritis – other                  | 167             | 50.9 (16.2)    | 95 (56.9)     |
| Crystal Arthropathy                             | 122             | 61.3 (15.3)    | 33 (27.0)     |
| Spondylitis/Spondyloarthropathy                 | 76              | 41.5 (15.2)    | 31 (40.8)     |
| Psoriatic Arthritis                             | 44              | 52.9 (12.6)    | 26 (59.1)     |
| Polymyalgia Rheumatica                          | 66              | 71.2 (9.2)     | 41 (62.1)     |
| Vasculitis                                      | 19              | 52.7 (23.5)    | 10 (52.6)     |
| Other systemic autoimmune rheumatic diseases    | 131             | 45.3 (13.9)    | 107 (81.7)    |
| <b>Regional Musculoskeletal (MSK) Syndromes</b> | 395             | 52.2 (15.8)    | 286 (72.4)    |
| <b>Chronic Pain Conditions</b>                  | 346             | 46.5 (14.3)    | 298 (86.1)    |
| <b>Osteoporosis</b>                             | 45              | 62.3 (15.2)    | 38 (84.4)     |
| <b>Other</b>                                    | 112             | 46.3 (16.3)    | 79 (70.5)     |

Table 3. Main Reasons for declined referrals

|                                                                                   | All Patients <sup>1</sup><br>n (%) |
|-----------------------------------------------------------------------------------|------------------------------------|
| <b>Patient declined or missed consultation after first referral sent</b>          | 68 (2.8)                           |
| Main Reasons:                                                                     |                                    |
| Symptoms resolved                                                                 | 6 (8.8)                            |
| Patient choice                                                                    | 21 (30.9)                          |
| Patient unavailable/missed appointment                                            | 26 (38.2)                          |
| <b>Rheumatologist declined consultation after first referral sent</b>             | 87 (3.4)                           |
| Main Reasons:                                                                     |                                    |
| Only consults for certain conditions                                              | 23 (26.4)                          |
| Rheumatologist suggested an alternate plan (e.g. pain clinic, another specialist) | 21 (24.1)                          |
| No reason provided                                                                | 19 (21.8)                          |
| Not accepting new patients                                                        | 10 (11.5)                          |
| <sup>1</sup> N=2430                                                               |                                    |

Confidential

**Table 4. Wait time from date of referral to rheumatologist consultation (\*Benchmarks Targets=100%)**

|                                                 | No. of Patients | Proportion of Patients seen by a rheumatologist within |              |              |          |          |           | Wait time (days) |                | Percentile <sup>1</sup> (days) |                  |
|-------------------------------------------------|-----------------|--------------------------------------------------------|--------------|--------------|----------|----------|-----------|------------------|----------------|--------------------------------|------------------|
|                                                 |                 | 4 Weeks                                                | 6 Weeks      | 3 Months     | 6 Months | 9 Months | 12 Months | Mean (SD)        | Median (IQR)   | 50 <sup>th</sup>               | 90 <sup>th</sup> |
| <b>All Patients</b>                             | 2430            | 23.8                                                   | 34.8         | 58.2         | 75.7     | 80.8     | 82.9      | 76<br>(69)       | 74<br>(27-101) | 57                             | 170              |
| <b>Arthritis</b>                                | 787             | 21.4                                                   | 31.6         | 57.7         | 76.4     | 81.3     | 84.0      | 80<br>(70)       | 73<br>(30-103) | 62                             | 174              |
| <b>Systemic Inflammatory Rheumatic Diseases</b> | 745             | 32.5                                                   | 44.7         | 66.6         | 80.1     | 84.4     | 86.3      | 64<br>(66)       | 66<br>(18-84)  | 43                             | 155              |
| Rheumatoid Arthritis                            | 120             | <b>38.3*</b>                                           | 47.5         | 70.8         | 79.1     | 84.2     | 86.7      | 63<br>(71)       | 66<br>(15-81)  | 37                             | 166              |
| Inflammatory Arthritis: other                   | 167             | <b>35.3*</b>                                           | 50.9         | 70.1         | 79.6     | 83.2     | 85.6      | 59<br>(67)       | 55<br>(17-71)  | 38                             | 128              |
| Crystal Arthropathy                             | 122             | 27.1                                                   | 41.8         | 63.9         | 82.8     | 87.7     | 88.5      | 70<br>(61)       | 69<br>(24-93)  | 52                             | 156              |
| Spondylitis/<br>Spondyloarthropathy             | 76              | 22.4                                                   | 31.6         | <b>63.2*</b> | 82.9     | 85.5     | 85.5      | 68<br>(50)       | 62<br>(29-91)  | 58                             | 146              |
| Psoriatic Arthritis                             | 44              | 25.0                                                   | <b>34.1*</b> | 59.1         | 86.4     | 95.5     | 97.7      | 85<br>(75)       | 88<br>(30-117) | 56                             | 189              |
| Polymyalgia Rheumatica                          | 66              | 47.0                                                   | 54.6         | 71.2         | 81.8     | 86.4     | 87.8      | 52<br>(61)       | 53<br>(11-64)  | 27                             | 131              |
| Vasculitis                                      | 19              | 52.6                                                   | 63.2         | 73.7         | 73.7     | 79.0     | 79.0      | 35<br>(51)       | 28<br>(11-39)  | 16                             | 71               |
| Other systemic rheumatic diseases               | 131             | 26.7                                                   | 40.5         | 61.8         | 75.6     | 78.6     | 81.7      | 68<br>(72)       | 62<br>(22-83)  | 46                             | 137              |
| <b>Regional MSK Syndromes</b>                   | 395             | 25.1                                                   | 36.7         | 60.8         | 77.7     | 81.8     | 83.5      | 70<br>(64)       | 68<br>(26-94)  | 53                             | 152              |
| <b>Chronic Pain Conditions</b>                  | 346             | 14.7                                                   | 25.4         | 46.5         | 68.2     | 76.0     | 78.3      | 92<br>(75)       | 90<br>(35-125) | 72                             | 204              |
| <b>Osteoporosis</b>                             | 45              | 7.0                                                    | 9.0          | 20.0         | 53.0     | 62.0     | 62.0      | 115<br>(62)      | 82<br>(74-156) | 118                            | 183              |
| <b>Other</b>                                    | 112             | 14.0                                                   | 24.0         | 48.0         | 66.0     | 71.0     | 73.0      | 86<br>(68)       | 69<br>(40-110) | 69                             | 175              |

<sup>1</sup>The 50th percentile reflects that half of the patients have seen a rheumatologist within this time frame and half are still waiting; 90th percentile reflects that 90% of patients have seen a rheumatologist within this time frame and 10% are still waiting; \*Benchmark Target = 100%

**Table 5. Total delay from symptom onset to rheumatologist consultation for systemic inflammatory rheumatic diseases**

|                                                                                                 | Rheumatoid Arthritis | Inflammatory Arthritis-other | Crystal Arthropathy | Spondylitis        | Psoriatic Arthritis | Polymyalgia Rheumatica | Vasculitis      | Other systemic rheumatic diseases |
|-------------------------------------------------------------------------------------------------|----------------------|------------------------------|---------------------|--------------------|---------------------|------------------------|-----------------|-----------------------------------|
| <b>Median (IQR), days</b>                                                                       |                      |                              |                     |                    |                     |                        |                 |                                   |
| Symptom onset to primary care visit <sup>1</sup>                                                | 173<br>(16-189)      | 102<br>(10-112)              | 188<br>(4-192)      | 716<br>(14-730)    | 228<br>(17-245)     | 63<br>(14-77)          | 128<br>(3-131)  | 208<br>(14-222)                   |
| Primary care visit to referral <sup>2</sup>                                                     | 115<br>(14-128)      | 125<br>(11-136)              | 353<br>(20-373)     | 173<br>(7-181)     | 513<br>(15-528)     | 123<br>(15-138)        | 73<br>(7-80)    | 181<br>(7-188)                    |
| Symptom onset to Referral <sup>2</sup>                                                          | 326<br>(49-375)      | 259<br>(41-300)              | 1326<br>(48-1374)   | 1342<br>(63-1405)  | 627<br>(90-7167)    | 238<br>(55-293)        | 293<br>(33-325) | 855<br>(44-899)                   |
| Referral to Rheumatologist <sup>3</sup>                                                         | 66<br>(15-81)        | 55<br>(17-71)                | 69<br>(24-93)       | 62<br>(29-91)      | 88<br>(30-117)      | 53<br>(11-64)          | 28<br>(11-39)   | 62<br>(22-83)                     |
| Symptom onset to Rheumatologist                                                                 | 327<br>(83-410)      | 260<br>(91-350)              | 1312<br>(111-1423)  | 1262<br>(112-1374) | 680<br>(125-805)    | 240<br>(81-321)        | 608<br>(59-667) | 940<br>(113-1053)                 |
| <b>Proportion of Patients seen by rheumatologists within</b>                                    |                      |                              |                     |                    |                     |                        |                 |                                   |
| 3 months from symptom onset                                                                     | 24%                  | 21%                          | 16%                 | 14%                | -                   | 28%                    | 28%             | 17%                               |
| 6 months from symptom onset                                                                     | 42%                  | 46%                          | 35%                 | 34%                | 34%                 | 53%                    | 39%             | 30%                               |
| 9 months from symptom onset                                                                     | 50%                  | 59%                          | 45%                 | 39%                | 43%                 | 63%                    | 44%             | 42%                               |
| 12 months from symptom onset                                                                    | 59%                  | 66%                          | 47%                 | 41%                | 49%                 | 72%                    | 56%             | 47%                               |
| <sup>1</sup> Defined as first documentation of the complaint within primary care medical record |                      |                              |                     |                    |                     |                        |                 |                                   |
| <sup>2</sup> Defined as the date the referral was sent out to the rheumatologist                |                      |                              |                     |                    |                     |                        |                 |                                   |
| <sup>3</sup> Defined as the first visit to the rheumatologist                                   |                      |                              |                     |                    |                     |                        |                 |                                   |

1  
2  
3  
4  
5  
6  
7  
8  
9  
10  
11  
12  
13  
14  
15  
16  
17  
18  
19  
20  
21  
22  
23  
24  
25  
26  
27  
28  
29  
30  
31  
32  
33  
34  
35  
36  
37  
38  
39  
40  
41  
42  
43  
44  
45  
46  
47  
48  
49

**Table 6. Median wait-time from referral to rheumatologist consultation according to patient’s health planning region (LHIN)**

| LHIN | LHIN NAME            | N           | %    | Median (IQR)             | No. of rheumatologists 2009/10 | No. of rheumatologists per 100,000 |
|------|----------------------|-------------|------|--------------------------|--------------------------------|------------------------------------|
| 1    | Erie St Clair        | <5          | -    | -                        | <5                             | 0.7                                |
| 2    | South West           | 182         | 7.5  | 146.5 (34.3-180.8)       | 9                              | 1.1                                |
| 3    | Waterloo Wellington  | 405         | 16.7 | 77.5 (28.0-105.5)        | <5                             | 0.5                                |
| 4    | Hamilton Niagara     | 67          | 2.8  | 71.2 (24.3-95.5)         | 19                             | 1.6                                |
| 5    | Central West         | 90          | 3.7  | 103.0 (41.0-144.0)       | 5                              | 0.8                                |
| 6    | Mississauga Halton   | 29          | 1.2  | 65.0 (17.0-82.0)         | 11                             | 1.2                                |
| 7    | Toronto Central      | 509         | 20.9 | 59.0 (15.0-74.0)         | 50                             | 5.2                                |
| 8    | Central              | 365         | 15.0 | 72.3 (27.0-99.3)         | 18                             | 1.3                                |
| 9    | Central East         | 184         | 7.6  | 46.3 (32.0-78.3)         | 12                             | 0.9                                |
| 10   | South East           | 13          | 0.5  | 125.2 (30.8-156.0)       | 6                              | 1.4                                |
| 11   | Champlain            | 166         | 6.8  | 112.2 (49.8-162.0)       | 19                             | 1.8                                |
| 12   | North Simcoe Muskoka | 224         | 9.2  | 77.5 (25.5-103.0)        | <5                             | 0.8                                |
| 13   | North East           | 190         | 7.8  | 55.0 (37.0-92.0)         | <5                             | 0.2                                |
| 14   | North West           | 0           | -    | -                        | <5                             | 1.0                                |
|      | Unknown              | 5           | 0.2  | 31.5 (43.75-75.25)       |                                |                                    |
|      | <b>All Ontario</b>   | <b>2430</b> |      | <b>74.0 (27.0-101.0)</b> | <b>162</b>                     | <b>1.5</b>                         |
